# Supplementary material for: Hexacyanometallate aqueous flow battery
Source: Research Square preprint supplement (doi:10.21203/rs.3.rs-568177/v1), 2021-06-15
Supplement: Supplementary file 1 [file 9252589eb84cb1be46896b68.docx]

**Supplementary Information**

**Hexacyanometallate aqueous flow battery**

Ji-Eun Jang1*, Ryeong-ah Kim1*, Chanhee Lee1, Sujin Kang1, Jaechan Ryu1, S. Jayasubramaniyan1, Jaephil Cho1, Wonyoung Choe2, Dong-Hwa Seo1†, Hyun-Wook Lee1†

Correspondence to: hyunwooklee@unist.ac.kr (H.W.L); dseo@unist.ac.kr (D.H.S.)

**This PDF file includes:**

Supplementary Note 1

Supplementary Figs. 1 to 4

Supplementary Tables 1 to 5

Supplementary References 1 to 10

**Other Supplementary Materials for this manuscript include the following:**

Supplementary Movie 1

**Supplementary Note 1 | Kinetic calculation**

*Diffusion coefficient* (*D*0) The diffusion coefficient and reduction rate constant for [Cr(CN)6]4-/3- at NaCN supporting electrolyte was obtained from cyclic voltammetry data (Fig. 4 and Supplementary Table 1), using the followed Randles-Sevcik equation at the quasi-reversible process.

Where *n* = the number of electrons, *F* is Faraday’s constant, *A* is the electrode area (0.071 cm2) for 3 mm diameters glassy carbon electrode. *C0* is the bulk concentration of K3[Cr(CN)6] solution (5 mM), *v* is the scan rate (20, 30 50, 100, 200, and 500 mV s‑1), *D0* is the diffusion coefficient of [Cr(CN)6]4-/3-, α is the charge transfer coefficient (0.5), and *na*is the number of electrons involved in the rate-determining step (1). The slopes of the cathodic and anodic sides are ±0.0002, and the calculated *D0* is 7.16 ×10-6 cm2 s-1.

*Charge transfer rate* (*k0*)

*k0* was calculated from *ΔEp*and *D0*which was obtained at the previous process using simple Nicholson method 1. The followed equation shows the relationship between *ΔEp*and *k0*.

Where *ψ*is the term related to *ΔEp*, *k0* is charge transfer rate*, Do* and *DR* are diffusion coefficient of oxidation and reduction process each (*DO*= *DR* = 7.16 ×10-4 cm2 s-1), *F* is Faraday’s constant, *v* is scan rate and *T* is temperature (= 25 C0). The relationships between *ψ* and *ΔEp*are in Supplementary Table 2. We assumed *ψ = 0.288* when *ΔEp*, = 134 mV, which is interpolated value. The corresponding at *v* is 500 mV sec-1 (0.5 V sec-1), giving *k0*= 6.03 × 10-3 cm s-1.


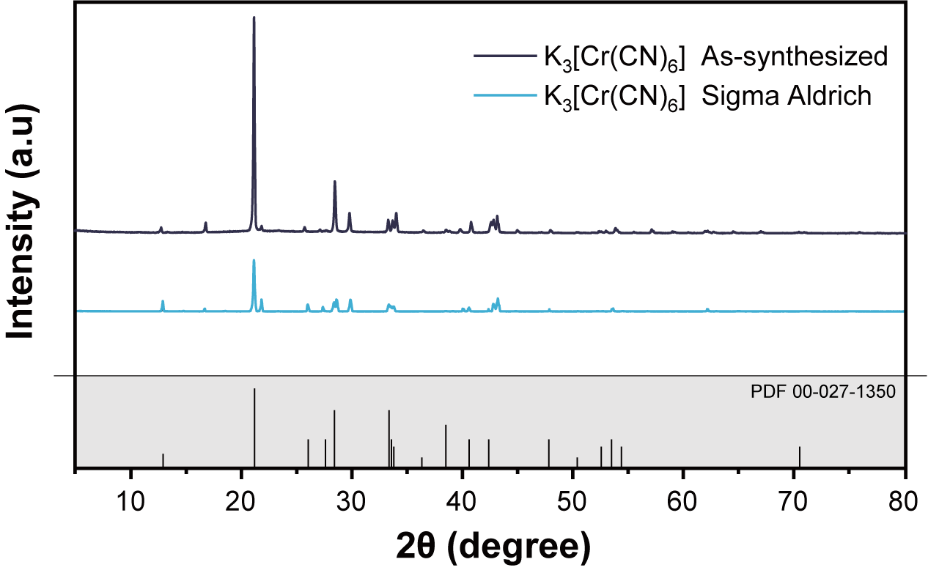


**Supplementary Figure 1 |** XRD patterns of K3[Fe(CN)6] produced by Sigma Aldrich and as-synthesized K3[Cr(CN)6]


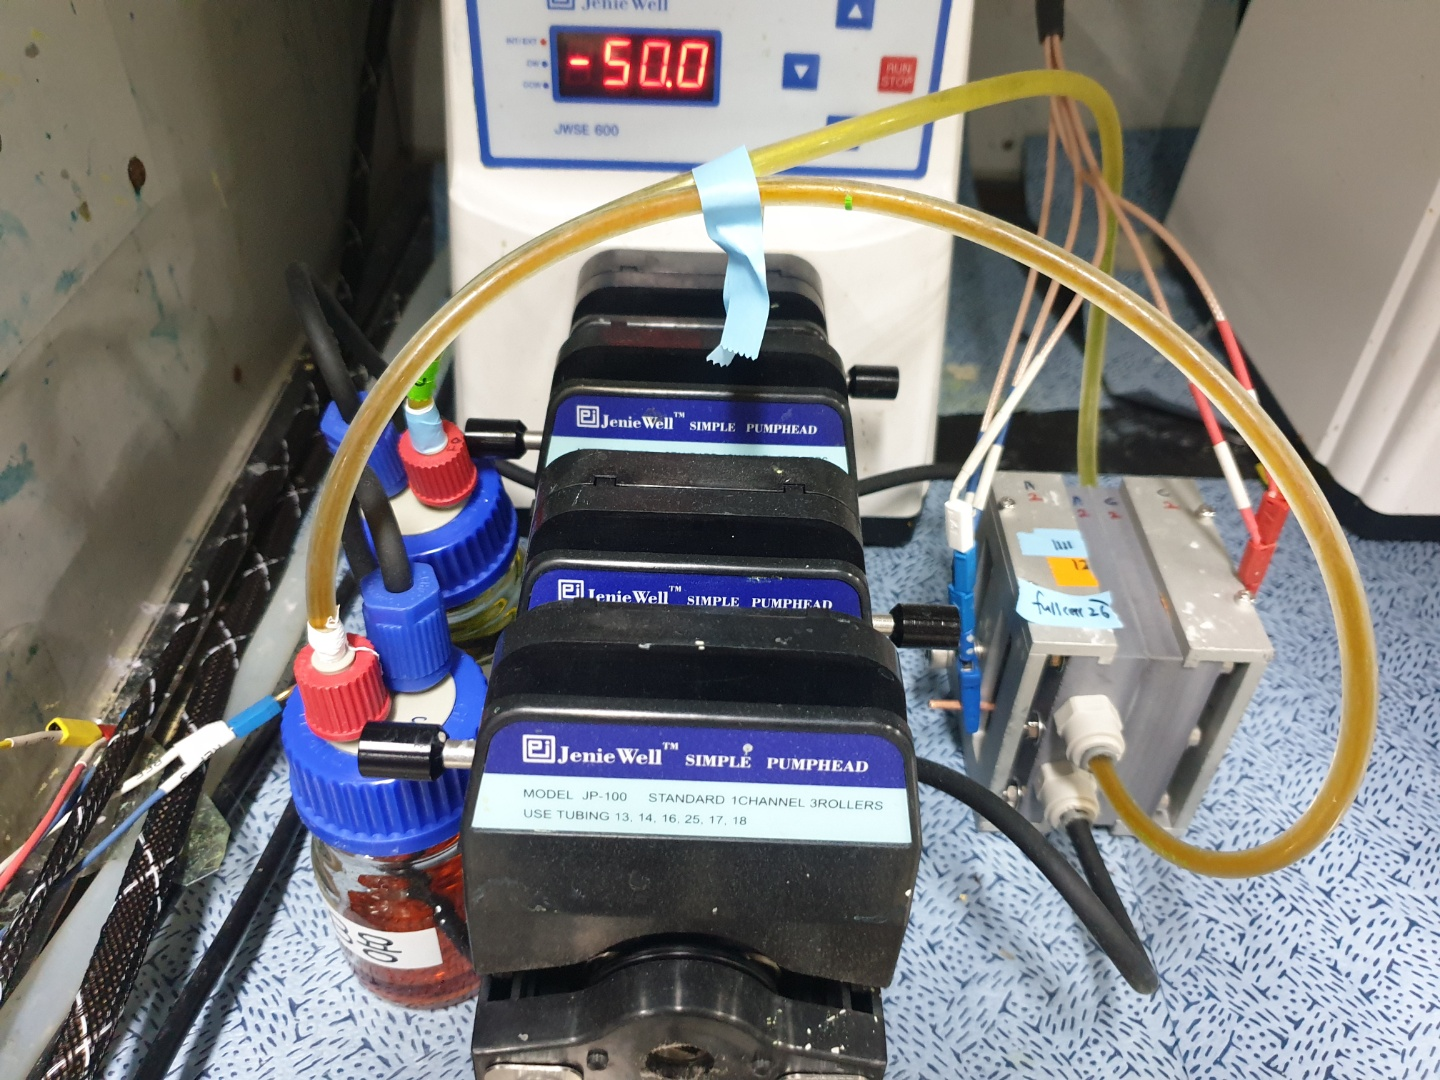


**Supplementary Figure 2 |** The full-cell configurations used in this work


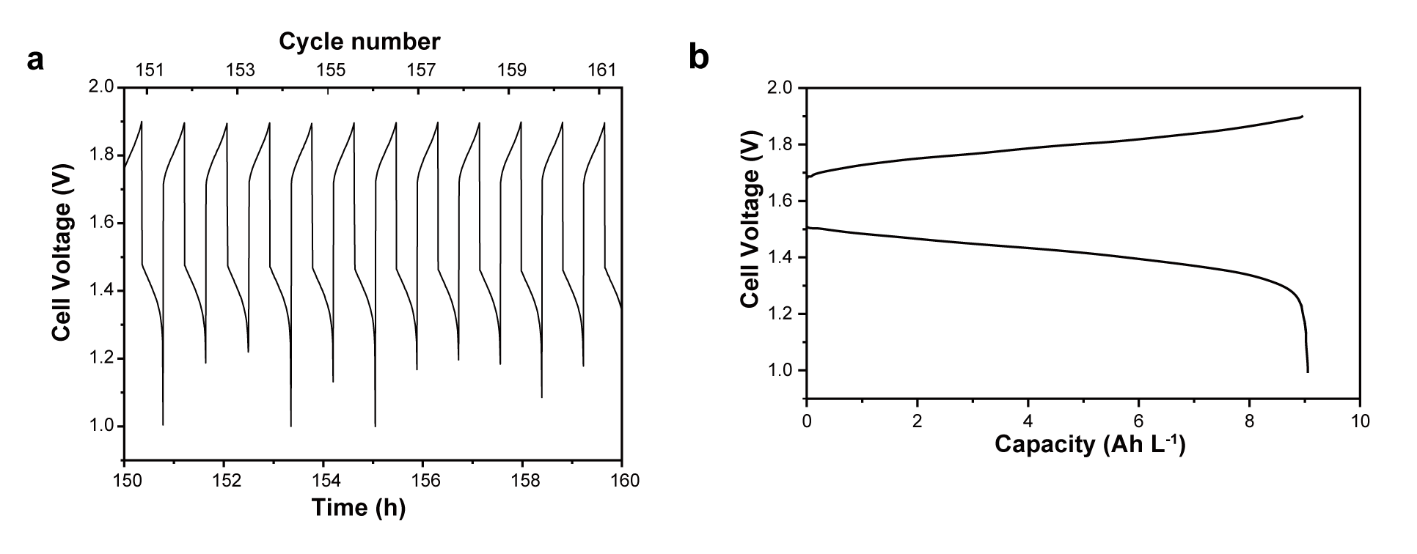


**Supplementary Figure 3 |** **Full cell cycling data at 0.1 A cm-2 a)** Cell potential as a function of time and cycle number, and **b)** corresponding single charging and discharging plot. The negolyte is 0.4 M of K3[Cr(CN)6] with 2 M NaCN, and the posolyte is 0.3 M of K4[Fe(CN)6] and K3[Fe(CN)6]


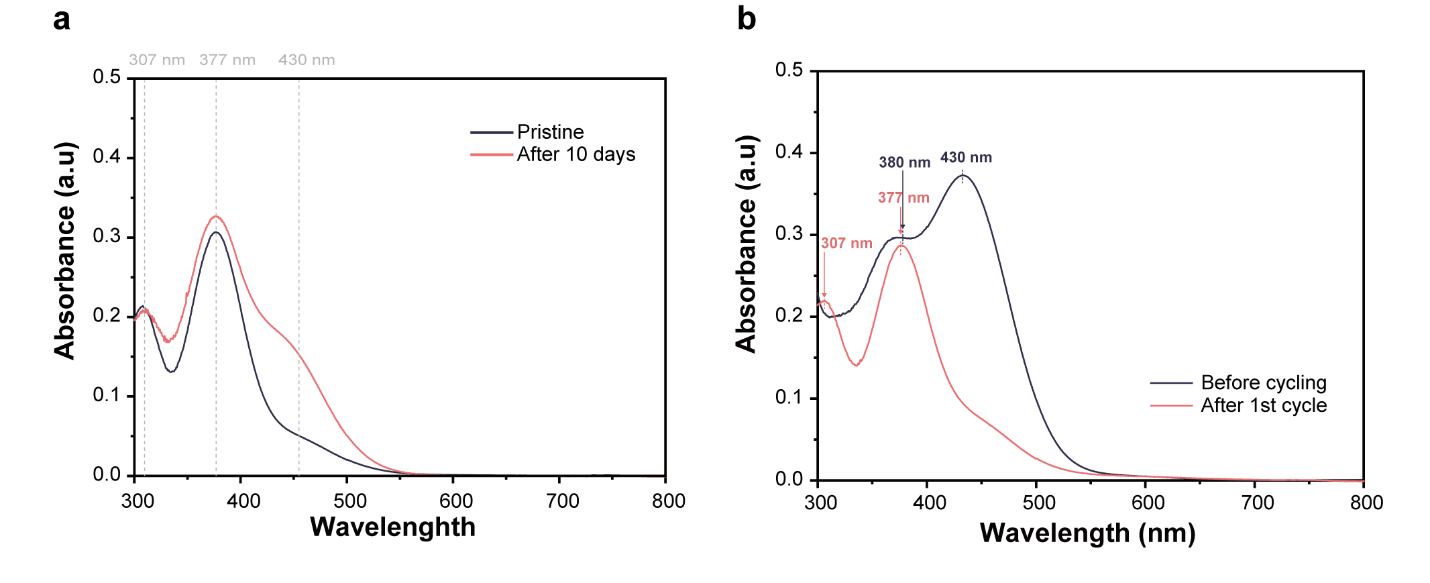


**Supplementary Figure 4 | UV-vis spectrum of the negolytes a)** UV-vis spectrum of the discharged negolytes – pristine (navy line) and after 10 days from starting cell operation (pink line) without shielding the ambient light. Increasing shoulder peak at 430 nm of pink line means some ligands of [Cr(CN)6]3- are exchanged to others ([Cr(CN)4(H2O)2]‑) during cell operation under the ambient light. **b)** UV-vis spectrum of negolytes before the cycling test and after 1st cycle. Before cycling test, the peaks are displayed at 380 and 430 nm, which is matched with [Cr(CN)4(H2O)2]‑. In contrast, the dominant peaks at 307 nm and 377 nm are observed, corresponding to [Cr(CN)6]3-. This indicates that the ligand exchange process, from H2O to CN- ligand occurs during the first cycle 2–4.


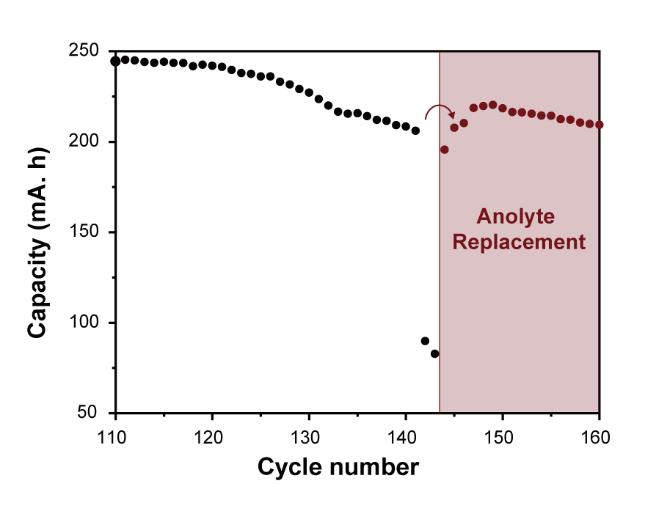


**Supplementary Figure 5 | Negolyte replacement and capacity recovering.** The cell capacity depending on cycle number. At 140th cycle, the cell was damaged on purpose and the capacity is recovered after replacement of the negolyte.


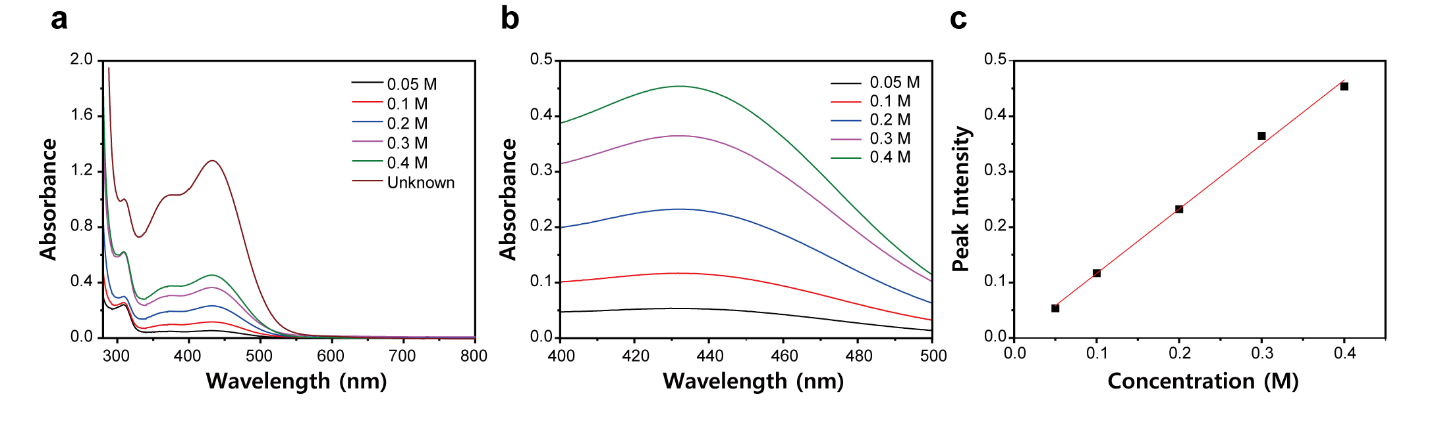


| **Concentration**  **(M)** | **Peak intensity** | **Wavelength**  **(nm)** |
| --- | --- | --- |
| 0.05 | 0.05359 | 429.5 |
| 0.1 | 0.11681 | 432 |
| 0.2 | 0.23244 | 431.5 |
| 0.3 | 0.36481 | 432 |
| 0.4 | 0.45393 | 431.5 |
| Unknown | 1.28014 | 432 |

**Supplementary Figure 6 | Solubility test through UV-vis spectroscopy. a)** Whole UV-vis spectrum of each synthesized K3[Cr(CN)6] concentrations (0.05, 0.1, 0.3, 0.4 M, and saturated solution(unknown). **b)** Zoom in the specific range (400 – 500 nm) determining the relationship between absorbance and concentration. **c)** The linear relationship between concentration peak intensity corresponding to **(b)**. (y = 1.1626x + 0.0002, R2 = 0.9964) Table indicates the specific the position and intensity of peaks.

| **Scan rate** **(mV sec-1)** | **ΔEp (mV)** |
| --- | --- |
| 20 | 81 |
| 30 | 83 |
| 50 | 87 |
| 100 | 94 |
| 200 | 111 |
| 500 | 134 |

**Supplementary Table 1 |** Peak to peak difference at the various scan rates of 5 mM K3[Cr(CN)6] in 1 M NaCN supporting electrolyte

| ***ψ*** | ***n(Epa-Epc)*/mV** | ***ψ*** | ***n(Epa-Epc)*/mV** |
| --- | --- | --- | --- |
| 20 | 61 | 0.38 | 117 |
| 7 | 63 | 0.35 | 121 |
| 6 | 64 | 0.26 | 140 |
| 5 | 65 | 0.25 | 141 |
| 3 | 68 | 0.16 | 176 |
| 2 | 72 | 0.14 | 188 |
| 1 | 84 | 0.12 | 200 |
| 0.91 | 86 | 0.11 | 204 |
| 0.80 | 89 | 0.10 | 212 |
| 0.75 | 92 | 0.077 | 240 |
| 0.61 | 96 | 0.074 | 244 |
| 0.54 | 104 | 0.048 | 290 |
| 0.50 | 105 |  |  |


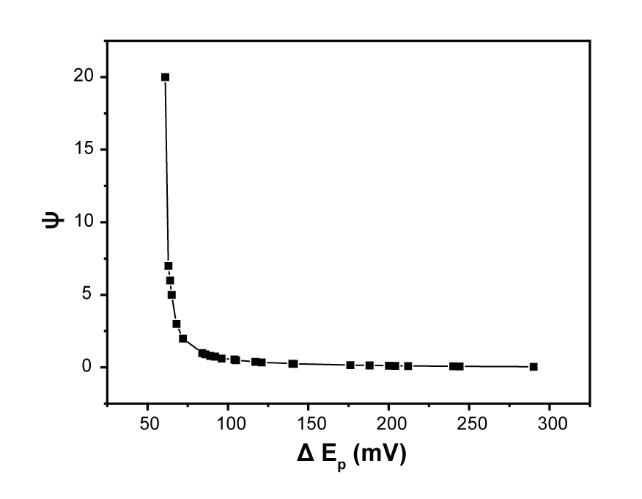


**Supplementary Table 2 |** The relationship between *ψ* and *ΔEp* at Nicholson’s method to calculate *k0*.

| **Material** | **Reduction**  **potential**  **(V vs SHE)** | ***D0***  **(cm2 s-1)** | ***k0*  (cm s-1)** | **Reference** |
| --- | --- | --- | --- | --- |
| K3[Cr(CN)6] | -1.13 | 7.16 × 10-6 | 6.03 × 10-3 | This work |
| Cr(III)-EDTA | -0.99 | 8.1 × 10-6 | - | 5 |
| Cr(III)-PDTA | -1.113 | 6.2 × 10-6 | 1.7 × 10-4 | 6 |
| CrCl3 | -0.41 | - | < 10-6 | 7 |
| CrCl3  (with Bi catalyst) | -0.41 | 6.2 × 10-6 | 1.35 × 10-3 | 8 |
| [Cr( f-DPA)2]Br | -0.71 | - | 10-3 | 7 |

**Supplementary Table 3 |** The electrochemical properties of Cr-based active materials

| **Energy (eV)** | **[CrCl6]4-** | **[Cr(H2O)6]2+** | **[Cr(NH3)6]2+** | **[Cr(CN)6]4-** |
| --- | --- | --- | --- | --- |
| Triplet (t2g4) | -103576.613 | -40889.198 | -37648.147 | **-43591.718** |
| Quintet (t2g3eg1) | **-103578.625** | **-40890.245** | **-37648.874** | -43591.365 |

**Supplementary Table 4 |** DFT energies of CrII-based compounds with different spin states.

| **Negolyte / Posolyte** | **Supporting**  **Electrolyte** | **Current density**  **(mA cm-2)** | **Cell voltage**  **(V)** | **Concentration**  **(M)** | **Energy density**  **(Wh L-1)** | **Cycles** | **Reference** |
| --- | --- | --- | --- | --- | --- | --- | --- |
| [Cr(CN)6]4-/3- / [Fe(CN)6]4-/3- | NaCN, NaCl | 100 | 1.5 | 0.4 | 11.19 | 250 | This work |
| Cr(III/II)-EDTA / Fe(II/III)-EDTA | Sodium acetate  buffer | 0.13 | 2.12 | 0.1 | 0.55 | - | 5 |
| Cr(II/III)-EDTA / Cr(III/V)-EDTA | Sodium acetate  buffer | 0.13 | 2.11 | 0.05 | 0.53 | - | 5 |
| Cr(II/III)-EDTA / Cr(III/V)-EDTA | Sodium acetate  buffer | Charge : 15, 30  Discharge : 2.5 | 2.17 | 0.1 , 0.2 | - | - | 9 |
| Cr(II/III)-PDTA / [Fe(CN)6]4-/3- | K2B4O7 | 100 | 1.53 | 0.4 | 12.5 | 75 | 6 |
| Cr(II/III)-PDTA / Br2 | K2B4O7, KBr | 100 | 2.2 | 0.4 | - | 10 | 6 |
| Cr( f-DPA)2]Br / [Fe(CN)6]4-/3- | KCl | 10 | 1.2 | 0.13 | 3 | 120 | 7 |
| Cr(II/III)-PDTA / Fe(II/III)-DTPA | K2B4O7 | 100 | 0.9 | 1.0 | 21~22 | 40 | 10 |

**Supplementary Table 5 |** Previoulsy reported Cr-based RFB

**Supplementary Movie 1.**

The discharge process of [Cr(CN)6]4-/3- negolyte, from SOC 100 % to SOC 0 %

**Supplementary Reference**

1. Nicholson, R. S. Theory and Application of Cyclic Voltammetry for Measurement of Electrode Reaction Kinetics. *Anal. Chem.* **37**, 1351–1355 (1965).

2. Adin, A., Sykes, A. G., Gates, H. S. & Kin, E. L. The Chromium(II)-catalysed Dissociation of Monochlorochromium(III). *J. Chem. Soc. A* **80**, 1518–1521 (1966).

3. Chiang, A. & Adamson, A. W. Photochemistry of Aqueous Cr(CN)6 3-. *J. Phys. Chem.* **72**, 3827–3831 (1968).

4. Wakefield, D. K., Schaap, W. B. & Wakefield2, D. K. Cyanoaquochromium(III) Complexes. Separation and Identification of the Neutral and Cationic Cyanoaquo Complexes of Chromium(III) and Aquation Kinetics of the Monocyanopentaaquochromium(III) Ion1. *Inorg. Chem.* **8**, 512–519 (1968).

5. Bae, C.-H., Roberts, E. P. L. & Dryfe, R. A. W. Chromium redox couples for application to redox flow batteries. *Electrochim. Acta* **48**, 279–287 (2002).

6. Robb, B. H., Farrell, J. M. & Marshak, M. P. Chelated Chromium Electrolyte Enabling High-Voltage Aqueous Flow Batteries. *Joule* **3**, 2503–2512 (2019).

7. Ruan, W. *et al.* Designing Cr complexes for a neutral Fe-Cr redox flow battery. *Chem. Commun.* **56**, 3171–3174 (2020).

8. C. D. Wu, D. A. Scherson,* E. J. Calvo, and E. B. Y. A Bismuth-Based Electrocatalyst for the Chromous-Chromic Couple in Acid Electrolytes. *J. Electrochem. Soc.* **133**, 2109–2112 (1986).

9. Bae, C., Roberts, E. P. L., Chakrabarti, M. H. & Saleem, M. All-chromium redox flow battery for renewable energy storage. *Int. J. Green Energy* **8**, 248–264 (2011).

10. Waters, S. E., Robb, B. H., Marshak, M. P. & Marshak, M. P. Effect of Chelation on Iron-Chromium Redox Flow Batteries. *ACS Energy Lett.* **5**, 1758–1762 (2020).
